# Supplementary material for: Incorporation of Synthetic mRNA in Injectable Chitosan-Alginate Hybrid Hydrogels for Local and Sustained Expression of Exogenous Proteins in Cells
Source: MDPI journal article supplement (doi:10.3390/ijms19051313), 2018-04-27
Supplement: s1 [file s1]

## Supplementary Figure 1

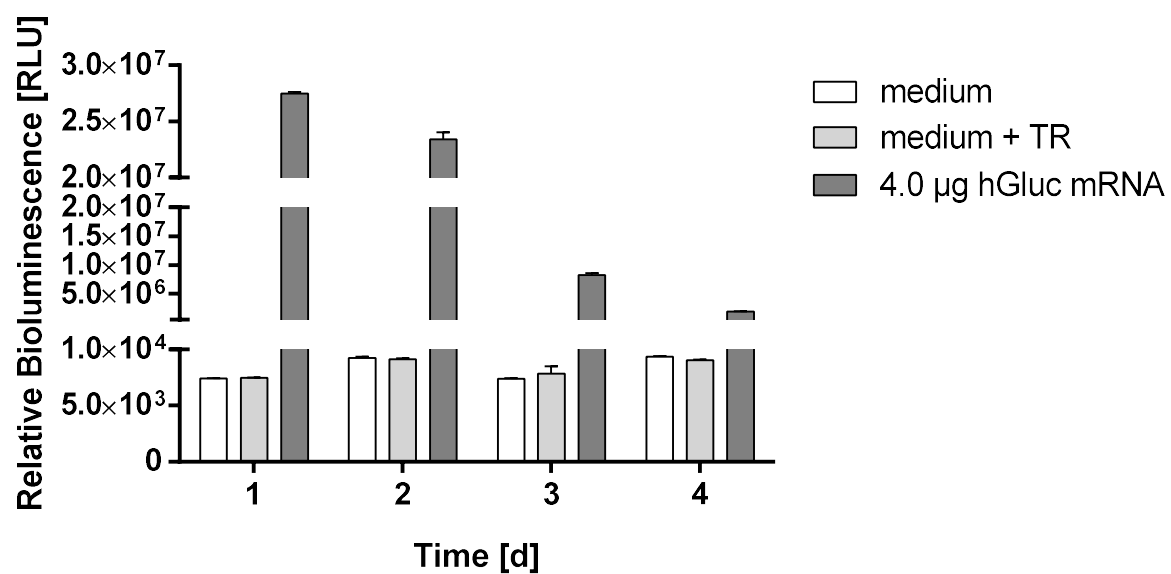

**Figure S1.** Luciferase activity after the transfection of HEK923 cells with synthetic hGLuc mRNA. TR: Transfection Reagent
